# Supplementary material for: Repurposing Study of 4-Acyl-1-phenylaminocarbonyl-2-substituted-piperazine Derivatives as Potential Anticancer Agents—In Vitro Evaluation against Breast Cancer Cells
Source: MDPI journal article supplement (doi:10.3390/ijms242317041), 2023-12-01
Supplement: s1 [file s1]

**Repurposing study of 4-Acyl-1-phenylaminocarbonyl-2-substituted-piperazine derivatives as potential antitumoral agents. *In vitro* evaluation against breast cancer cells.**

Emilio Guillén-Mancina,<sup>†</sup> María del Rosario García-Lozano,<sup>†</sup> Estefanía Burgos-Morón, Sarah Mazzotta, Pablo Martínez-Aguado, José Manuel Calderón-Montaña, José Manuel Vega-Pérez, Miguel López-Lázaro, Fernando Iglesias-Guerra\* and Margarita Vega-Holm\*

**CONTENTS**

- Figure S1** Evaluation of cytotoxic activity of compounds **7, 8, 11 - 17** on human non-malignant breast cells (MCF 10A) and human breast cancer cells (MCF7).
- Figure S2** Evaluation of cytotoxic activity of compounds **21 - 25** on human non-malignant breast cells (MCF 10A) and human breast cancer cells (MCF7).
- Figure S3** Evaluation of cytotoxic activity of compounds **27 – 30, 33 and 34** on human non-malignant breast cells (MCF 10A) and human breast cancer cells (MCF7).
- Figure S4.** Evaluation of cytotoxic activity of compounds **36, 38 and 39** on human non-malignant breast cells (MCF 10A) and human breast cancer cells (MCF7).
- Figure S5** NMR-Spectra of compound **41**
- Figure S6** HRMS spectra compound **41**

**Table S1** Predicted physicochemical properties of selected compounds using SwissADME software.

**Table S2** ADME data of selected compounds calculated using preADMET software.

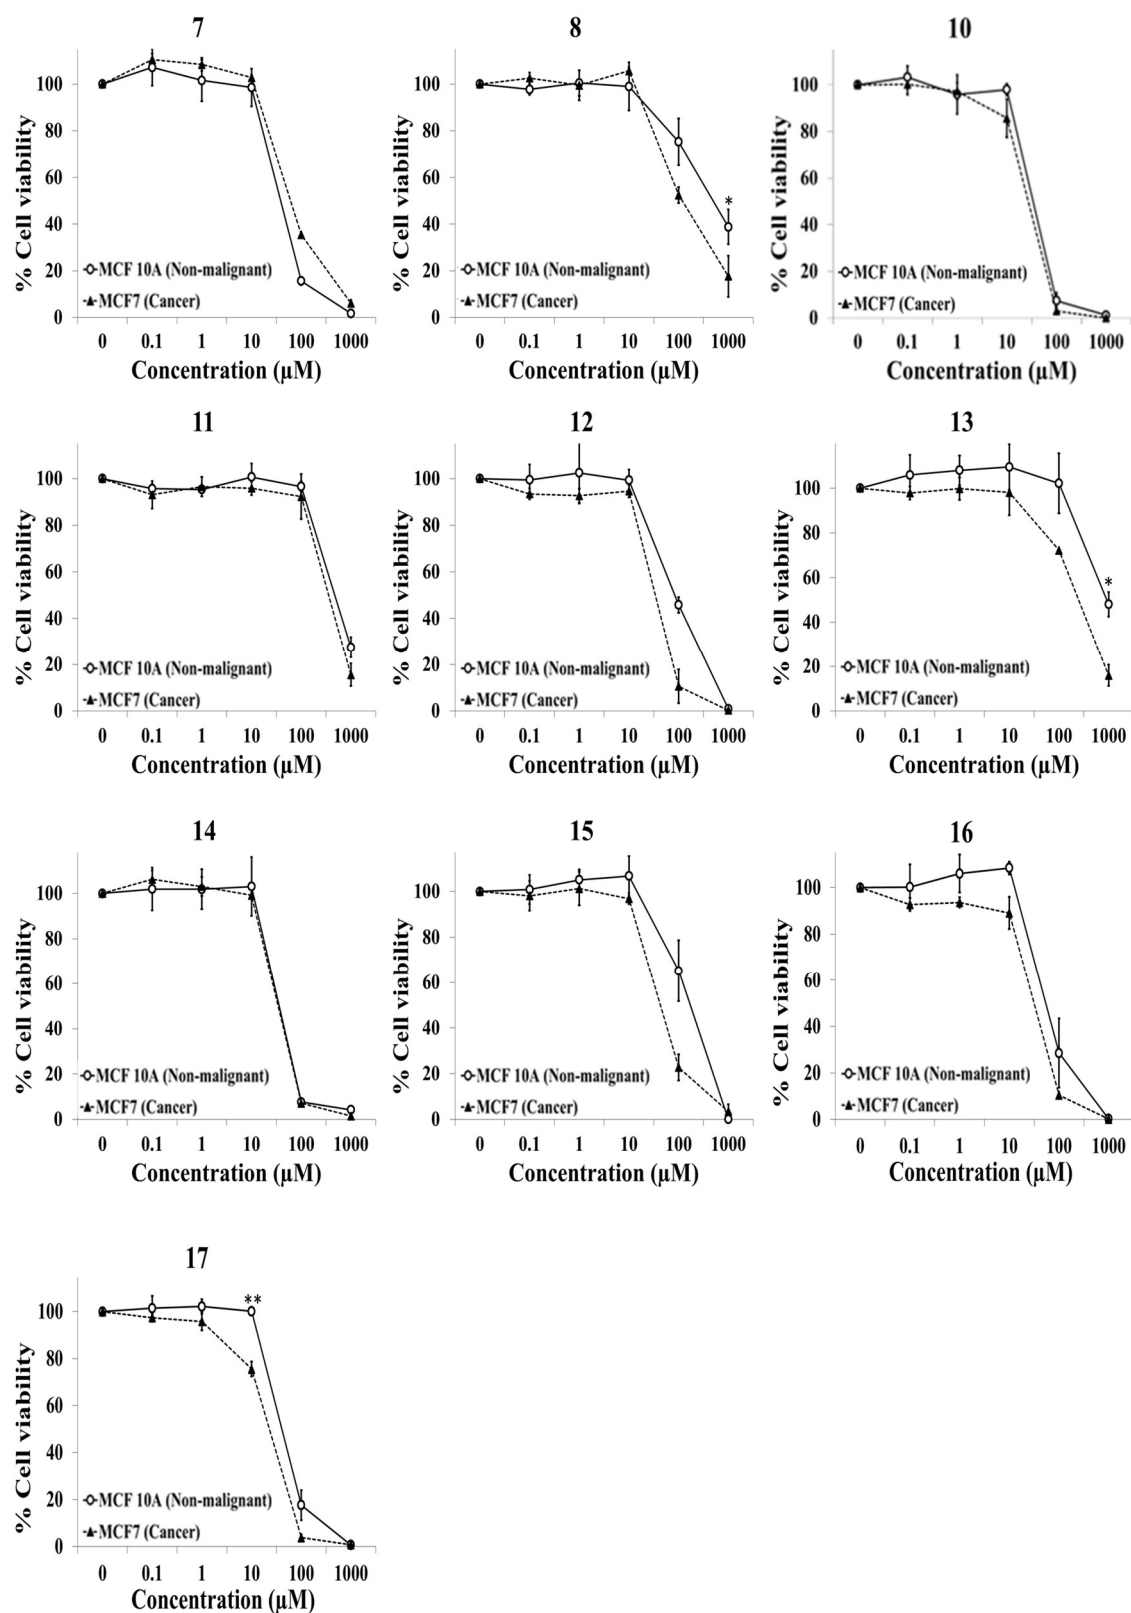

**Figure S1.** Evaluation of cytotoxic activity of compounds 7, 8, 11 - 17 on human non-malignant breast cells (MCF 10A) and human breast cancer cells (MCF7). Cells were exposed to several concentrations of compounds for 72 h and cell viability was determined with the MTT assay. Data represent mean  $\pm$  SE) from at least two independent experiments. Student's t-test was performed to compare the cytotoxicity of a particular concentration of the compound between MCF 10A and MCF7, \* indicates  $p < 0.05$ , \*\* indicates  $p < 0.01$ .

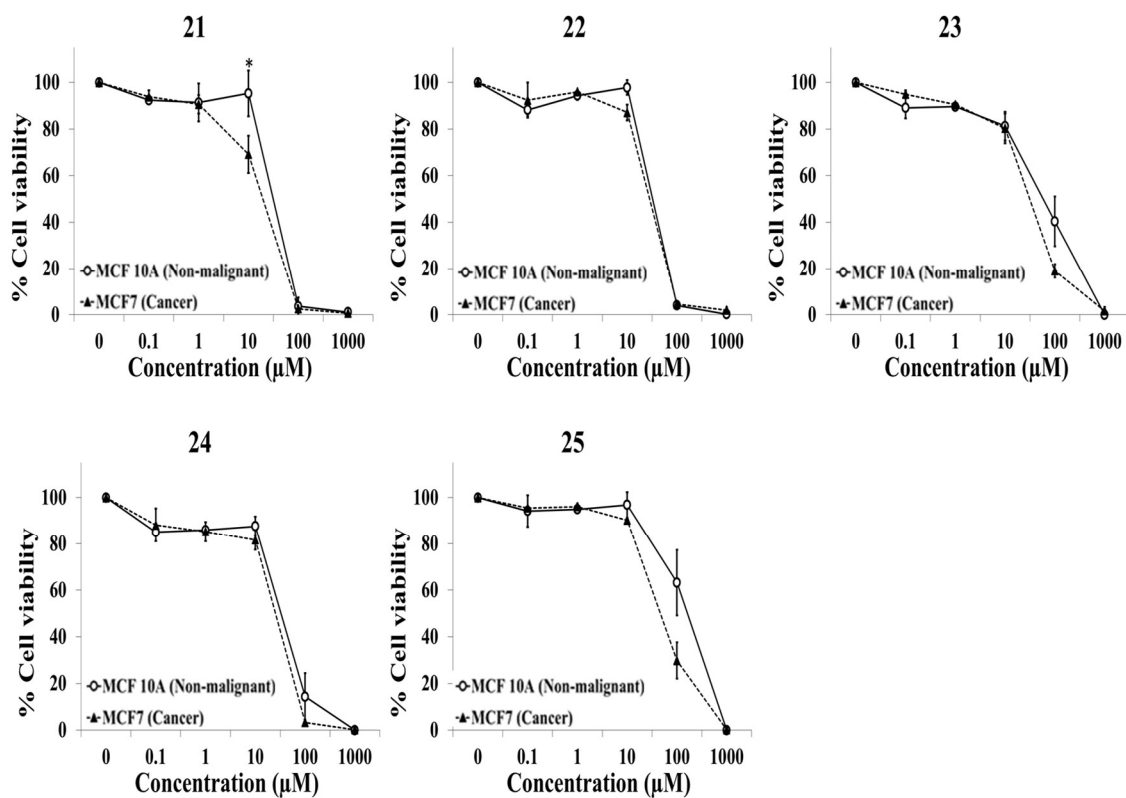

**Figure S2.** Evaluation of cytotoxic activity of compounds 21 - 25 on human non-malignant breast cells (MCF 10A) and human breast cancer cells (MCF7). Cells were exposed to several concentrations of compounds for 72 h and cell viability was determined with the MTT assay. Data represent mean ± SE) from at least two independent experiments. Student's t-test was performed to compare the cytotoxicity of a particular concentration of the compound between MCF 10A and MCF7, \* indicates  $p < 0.05$ .

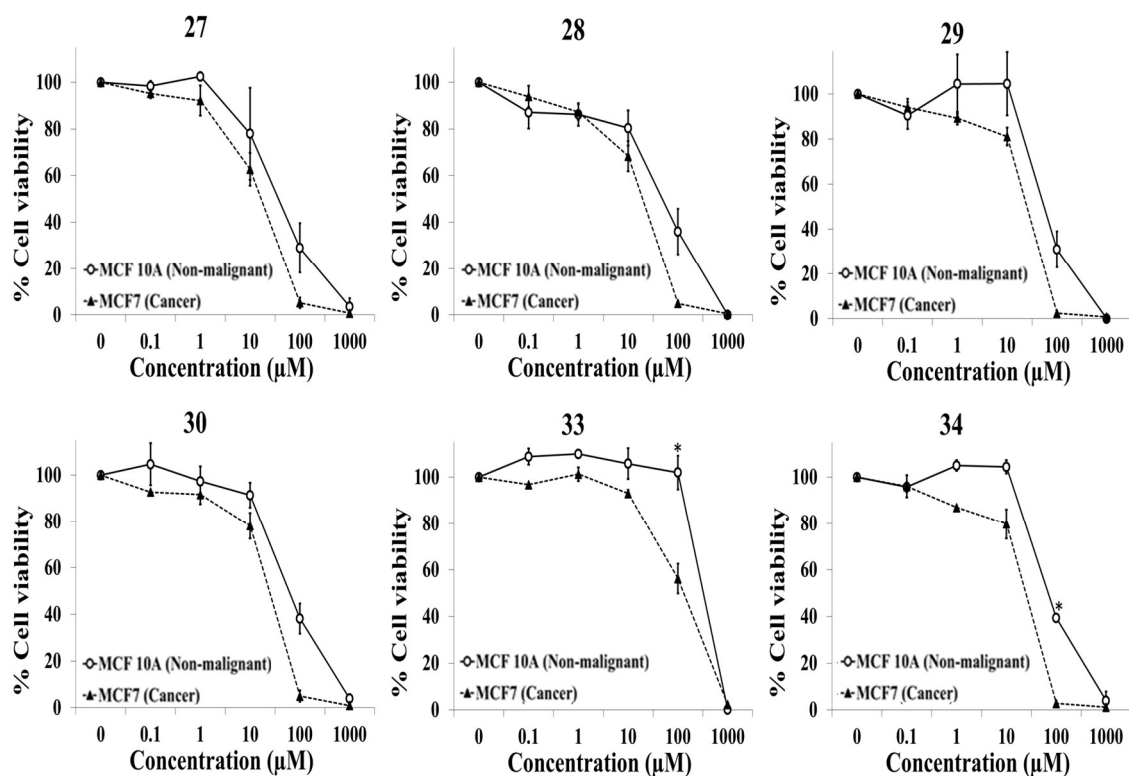

**Figure S3.** Evaluation of cytotoxic activity of compounds 27 – 30, 33 and 34 on human non-malignant breast cells (MCF 10A) and human breast cancer cells (MCF7). Cells were exposed to several concentrations of compounds for 72 h and cell viability was determined with the MTT assay. Data represent mean  $\pm$  SE) from at least two independent experiments. Student's t-test was performed to compare the cytotoxicity of a particular concentration of the compound between MCF 10A and MCF7, \* indicates  $p < 0.05$ .

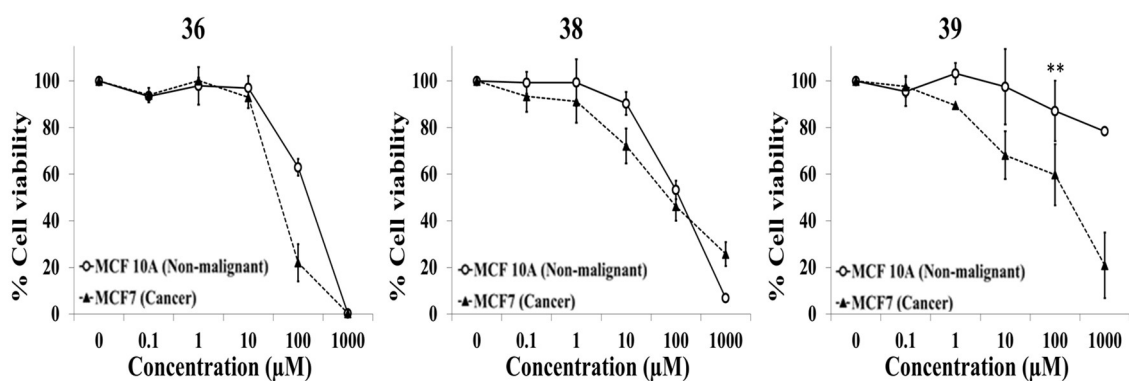

**Figure S4.** Evaluation of cytotoxic activity of compounds 36, 38 and 39 on human non-malignant breast cells (MCF 10A) and human breast cancer cells (MCF7). Cells were exposed to several concentrations of compounds for 72 h and cell viability was determined with the MTT assay. Data represent mean  $\pm$  SE) from at least two independent experiments. Student's t-test was performed to compare the cytotoxicity of a particular concentration of the compound between MCF 10A and MCF7, \*\* indicates  $p < 0.01$ .

a)

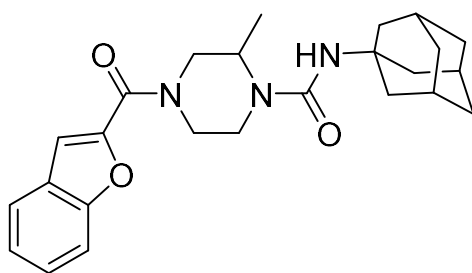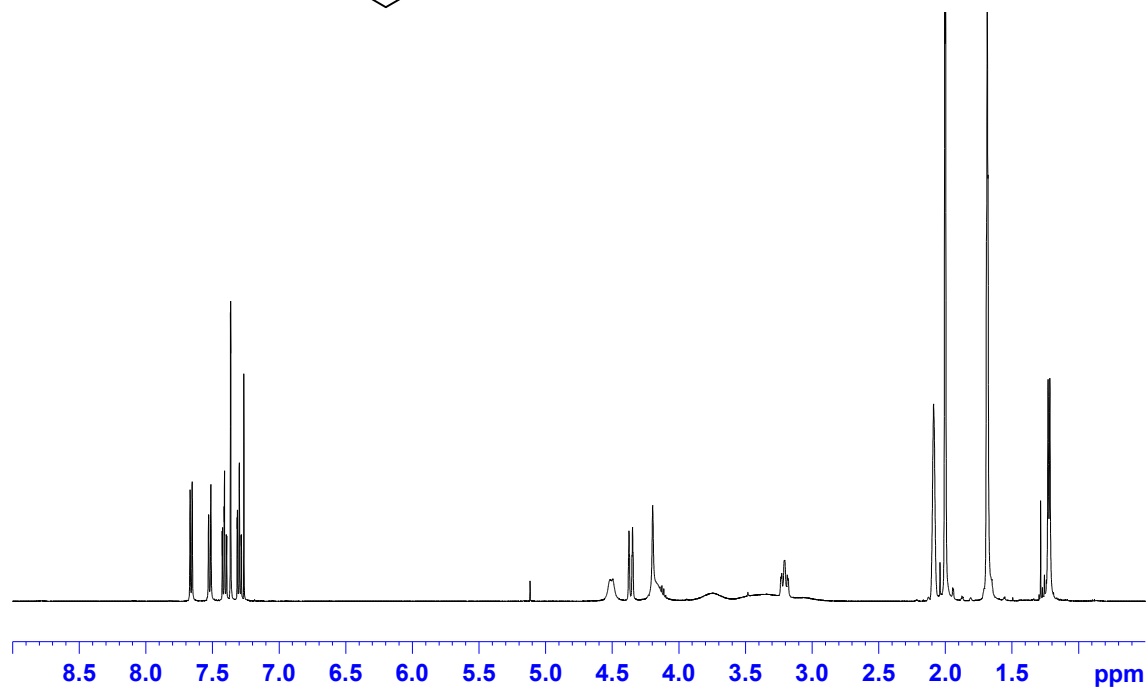

b)

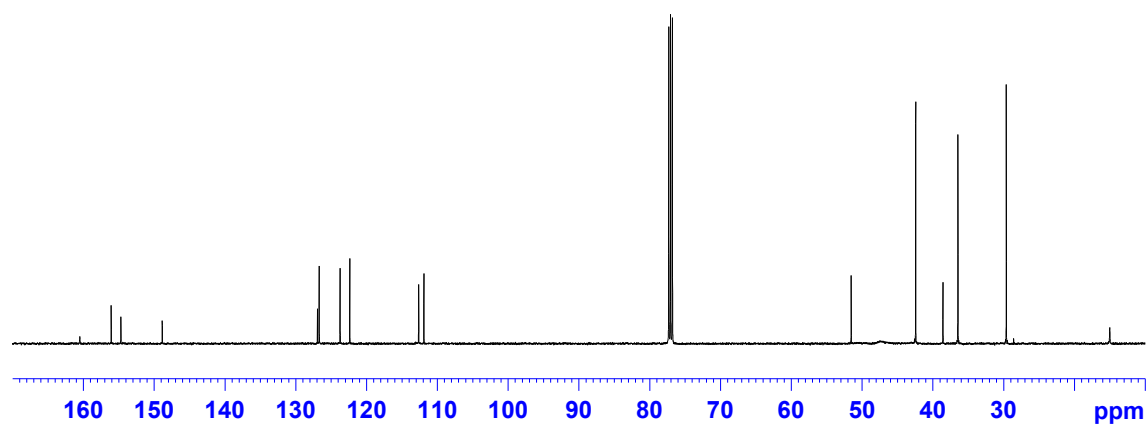

**Figure S5.** NMR-Spectra of compound 4-(Benzofuran-2-carbonyl)-2-methyl-1-[(1-adamantyl)-aminocarbonyl]piperazine **41**. **a)**  $^1\text{H}$  NMR and **b)**  $^{13}\text{C}$  NMR.

221118\_VIP528 #51-76 RT: 0.22-0.35 AV: 26 NL: 5.05E7  
T: FTMS + c ESI Full ms [60.00-900.00]

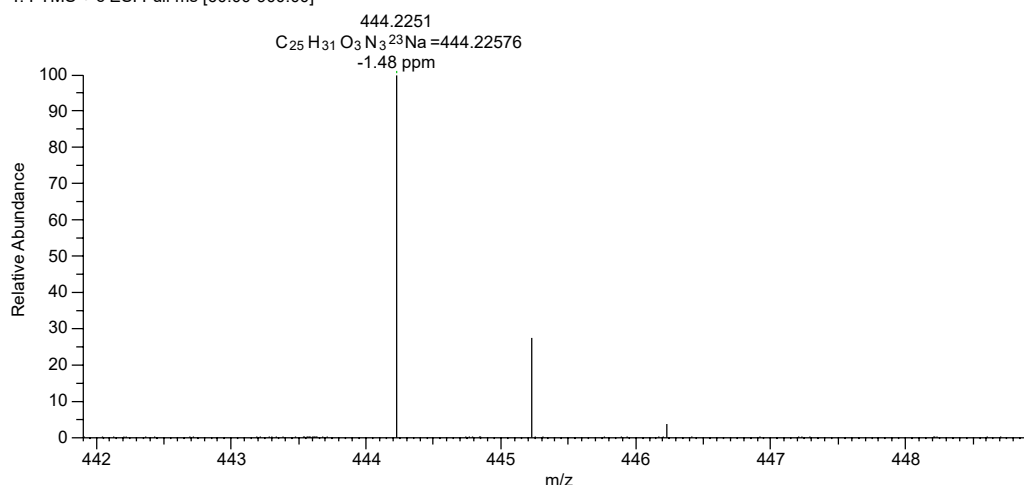

**Figure S6.** HRMS spectra of 4-(Benzofuran-2-carbonyl)-2-methyl-1-[(1-adamantyl)aminocarbonyl]piperazine (**41**).

**Table S1.** Predicted physicochemical properties of selected compounds using SwissADME software.

| Comp | Parameter |      |     |     |     |        |       |        |
|------|-----------|------|-----|-----|-----|--------|-------|--------|
|      | MW        | LogP | HBD | HBA | nVs | TPSA   | %ABS  | nrothb |
| AR   | ≤500      | ≤5   | ≤5  | ≤10 | ≤1  | <140   | -     | ≤10    |
| 26   | 426.47    | 2.34 | 1   | 5   | 0   | 107.78 | 71.82 | 8      |
| 27   | 415.91    | 3.61 | 1   | 3   | 0   | 61.88  | 87.65 | 7      |
| 28   | 406.48    | 2.86 | 1   | 4   | 0   | 85.67  | 79.44 | 7      |
| 31   | 483.91    | 4.62 | 1   | 6   | 0   | 61.88  | 87.65 | 8      |
| 32   | 483.91    | 4.62 | 1   | 6   | 0   | 61.88  | 87.65 | 8      |
| 35   | 470.48    | 3.06 | 1   | 5   | 0   | 111.61 | 70.49 | 7      |
| 37   | 450.49    | 3.40 | 1   | 4   | 0   | 89.58  | 78.09 | 6      |
| 41   | 421.53    | 3.49 | 1   | 3   | 0   | 65.79  | 86.30 | 5      |

AR, accepted range; MW, Molecular weight; LogP, lipophilicity, (consensus Log P<sub>o/w</sub>); HBD, Number of hydrogen bond donors; HBA, Number of hydrogen bond acceptors; nVs, Number of Lipinski rule violations; TPSA, PSA (Å<sup>2</sup>); %ABS, percentage of oral absorption; nrothb, number of rotatable bonds.

**Table S2.** ADME data of selected compounds calculated using preADMET software.

| Parameter           | Compound |       |       |       |       |       |       |       |
|---------------------|----------|-------|-------|-------|-------|-------|-------|-------|
|                     | 26       | 27    | 28    | 31    | 32    | 35    | 37    | 41    |
| <b>Absorption</b>   |          |       |       |       |       |       |       |       |
| <b>HIA (%)</b>      | 96.43    | 96.37 | 96.87 | 96.49 | 96.49 | 97.72 | 96.69 | 96.20 |
| <b>Caco2</b>        | 21.80    | 41.10 | 23.47 | 45.10 | 45.10 | 22.95 | 30.15 | 37.92 |
| <b>Log Kp</b>       | -2.07    | -2.15 | -2.09 | -1.72 | -1.72 | -2.49 | -2.55 | -4.23 |
| <b>Distribution</b> |          |       |       |       |       |       |       |       |
| <b>BBB</b>          | 0.015    | 0.380 | 0.036 | 1.180 | 1.180 | 0.039 | 0.042 | 0.099 |
| <b>PPB (%)</b>      | 87.11    | 88.63 | 86.64 | 89.06 | 89.06 | 91.42 | 93.23 | 89.44 |

HIA: percentage human intestinal absorption; Caco2: permeability through cells derived from Human Colon Adenocarcinoma (nm/s); Log Kp: skin permeability; BBB: blood-brain barrier; PPB: plasma-protein binding.
